# Supplementary material for: A straightforward approach towards cyclic peptides via ring-closing metathesis—scope and limitations
Source: Royal Society of Chemistry journal article supplement (doi:10.1039/b411228h), 2004-11-26
Supplement: b411228h-esi.doc [file b411228h-esi.doc]

A Straightforward Approach towards Cyclic Peptides via Ring Closing Metathesis – Scope and Limitations

Uli Kazmaier,* Christina Hebach, Anja Watzke, Sabine Maier, Heike Mues, Volker Huch

Institut für Organische Chemie, Universität des Saarlandes, D-66123 Saarbrücken, Germany. Fax: +49 681 302 2409; Tel: +49 681 302 2409; E-mail: u.kazmaier@mx.uni-saarland.de

# Supporting Information

# Table of contents

# Preparation and Analytical / Spectroscopic Data of linear Tetrapeptides

# Peptide 10 S2

# Peptide 11 S2

# Peptide 12 S3

# Peptide 15 S3

# Peptide 17 S4

# Peptide 19 S5

# XRay-Data

# Cyclopeptide 27 S6

# Cyclopeptide 28 S10

# Cyclopeptide 29 S17

# Supporting Informations

Preparation and Analytical / Spectroscopic Data of linear Tetrapeptides

**10:** Boc-(*S*)-Val-(*S*)-LeuOAll (257 mg, 0.60 mmol) was dissolved in 15 ml of THF, before SnCl2 (228 mg, 1.20 mmol) was added. The mixture was cooled to -78°C. A fresh prepared solution of 3 mmol LHMDS in 10 ml of THF was added slowly and the reaction mixture was allowed to warm to room temperature overnight. The resulting solution was hydrolyzed by vigorous stirring for 1 h with 5 ml 1N HCl solution. After separation of the aqueous layer the rearrangement product was extracted three times with 20 ml of 1N NaOH solution. The combined basic aqueous layers were acidified with 1N HCl solution (pH 1) and the peptide was extracted twice with methylene chloride (25 ml each) before it was converted into the corresponding methyl esters with diazomethane. After evaporation of the solvent, the crude product was purified by flash chromatography (silica, hexanes/EtOAc, 70:30). Yield: 185 mg (0.42 mmol, 70 % d.Th.) colorless foam. Diastereomeric ratio: 82/18 (NMR).

**HPLC** (Daicel OD-H, hexane/isopropanol 98/2, 0.5 ml/min): tR1 = 31.6 min, tR2 = 40.0 min.

**1H NMR** (300 MHz, CDCl3):  = 0.87-0.94 (12H, m, 16-H, 18-H), 1.41 (9H, s, 1-H), 1.48-1.66 (3H, m, 15-H, 14-H), 2.10 (1H, mc, 17-H), 2.49 (2H, mc, 11-H), 3.70 (3H, s, 10-H), 3.88 (1H, mc, 4-H), 4.45 (1H, mc, 8-H), 4.57 (1H, mc, 6-H); 5.06-5.09 (1H, m, BocN-H), 5.07 (1H, d, *J* 9.6, 13-H), 5.08 (1H, d, *J* 16.9, 13-H), 5.62 (1H, ddt, *J* 17.2, 9.6 and 7.0, 12-H), 6.51 (1H, d, *J* 7.7, N-H), 6.72 (1H, d, *J* 7.7, N-H).

**13C NMR** (75 MHz, CDCl3):  = 17.58, 19.06 (18), 21.77, 22.60 (16), 24.38 (15), 28.05 (1), 30.40 (17), 36.05 (11), 51.32 (6), 51.52 (10), 52.08 (8), 59.82 (4), 79.77 (2), 119.01 (13), 131.76 (12), 155.65 (3), 171.15, 171.48, 171.52 (5, 7, 9).

**EA:** C22H39N3O6 (441.56) calcd.: C 59.84 H 8.90 N 9.52; found: C 59.63 H 8.89 N 9.38.

**11: 11** was obtained from **10** in a 0.45 mmol scale according to scheme 4. Flash chromatography (silica, hexanes/EtOAc, 1:1) provided **11** in 90% yield as colorless foam.

**1H NMR** (300 MHz, CDCl3):  = 0.82-0.91 (2H, m, 21-H, 23-H), 1.46-1.66 (3H, m, 19-H, 21-H), 1.99 (1H, mc, 22-H), 2.37 (3H, s, 1-H), 2.40-2.57 (3H, m, 7-H, 16-H), 2.65-2.73 (1H, m, 16-H), 3.38 (2H, mc, 6-H), 3.66 (3H, s, 15-H), 3.74 (2H, d, *J* 5.1, 24-H), 4.40 (1H, mc, 11-H), 4.59-4.68 (2H, m, 9-H, 13-H), 4.96-5.16 (4H, m, 18-H, 26-H), 5.48-5.69 (2H, m, 17-H, 25-H), 7.20-7.31 (2H, m, je N-H), 7.25 (2H, d, *J* 8.0, 3-H), 7.65 (2H, d, *J* 8.3, 4-H), 7.66 (1H, d, *J* 8.2, N-H).

**13C NMR** (75 MHz, CDCl3):  = 18.45, 19.09 (2q, C-23), 21.43 (q, C-1), 22.41, 22.51 (2q, C-21), 24.62 (d, C-20), 31.19 (d, C-22), 36.31 (t, C-7), 38.55 (t, C-16), 41.15 (t, C-19), 43.99 (t, C-6), 51.62 (q, C-15), 51.72 (t, C-24), 51.82 (d, C-13), 52.20 (d, C-11), 58.45 (d, C-9), 118.71, 119.08 (2t, C-18, C-26), 127.23 (2d, C-3), 129.67 (2d, C-4), 132.34, 132.85 (2d, C-17, C-25), 136.38 (s, C-2), 143.35 (s, C-5), 170.65, 171.25, 171.89, 171.97 (4s, C-8, C-10, C-12, C-14).

**EA:** C30H46N4O7S(606.78) calcd.: C 59.38 H 7.64 N 9.23; found: C 59.48 H 7.52 N 9.28.

**12: 12** was obtained from **10** in a 0.9 mmol scale according to scheme 4. Flash chromatography (silica, hexanes/EtOAc, 1:1) provided **12** in 88% yield as a pale yellow solid, mp. 136-137°C.

**1H NMR** (300 MHz, CDCl3): d = 0.86-0.98 (12 H, m, 10-H, 11-H, 15-H, 16-H), 1.44 (9H, s, 25-H, 26-H, 27-H), 1.55-1.62 (3H, m, 8-H, 9-H), 2.37 (1H, bs, 14-H), 2.53 (2H, m, 3-H), 3.60 (1H, m, 19a-H), 3.68 and 3.70 (3H, s, 28-H) (2 diastereomers), 3.77 (1H, m, 19b-H), 3.40 (1H, m, 7-H), 4.23 (2H, m, 20-H), 4.45 (1H, m, 18-H), 4.60 (1H, m, 13-H), 5.07-5.28 (4H, m, 5-H, 22-H), 5.47 (1H, dbr, Boc-N-H), 5.73 (1H, m, 21-H), 5.85 (1H, ddd, *J* = 16.2, 10.4 and 5.8, 4-H), 6.77 (1H, dbr, N-H), 6.90 (1H, dbr, N-H), 6.96 (1H, dbr, N-H).

**13C NMR** (75 MHz, CDCl3): d = 17.34 (q, C-15), 19.40 (q, C-16), 21.19 (q, C-10), 22.98 (q, C-11), 24.78 (d, C-9), 28.26 (3q, C-25, C-26, C-27), 30.88 (d, C-14), 40.26 (t, C-3), 40.30 (t, C-8), 51.55 und 52.03 (q, C-28) (2 diastereomers), 51.89 (d, C-2), 52.24 (d, C-7), 58.01 (d, C-18), 59.56 (d, C-13), 69.09 (t, C-19), 72.34 (t, C-20), 80.82 (s, C-24), 117.97 (t, C-22), 118.70 (t, C-5), 132.60 (d, C-21), 133.68 (d, C-4), 155.26 (s, C-23), 170.69 (s, C-17), 171.29 (s, C-12), 171.75 (s, C-6), 172.13 (s, C-1).

**HMRS**: calcd for C28H49O8N4 ([M+H]+), 569.3550; found, 569.3548; calcd for C28H48O8N4Na ([M+Na]+), 591.3370; found, 591.3382.

**15: 15** was obtained from (*S*)-*N*-(*tert*-butyloxycarbonyl)-*O*-allyl-seryl-(*S*)-valine (124 mg, 0.36 mmol) and (*S*)-leucyl-(*S*)-*O*-allylserine methylester (98 mg, 0.36 mmol) in CH2Cl2 (10 mL) using TBTU (115 mg, 0.36 mmol) as coupling reagent in the presence of NEt3 (73 mg, 0.72 mmol). Flash chromatography (silica, hexanes/EtOAc, 1:1) provided **15** (133 mg, 0.22 mmol, 62 %) as a colorless solid, mp. 145-146°C. [a]20 = 12.0 (c 0.7, CHCl3).

**1H NMR** (300 MHz, CDCl3): d = 0.81-0.95 (12H, m, 11-H, 12-H, 16-H, 17-H), 1.44 (9H, s, 26-H, 27-H, 28-H), 1.61 (3H, m, 9-H, 10-H), 2.48 (1H, m, 15-H), 3.57 (1H, dd, *J* = 9.6 and 6.3, 2a-H), 3.63 (1H, dd, *J* 9.7 and 6.2, 20a-H), 3.73 (3H, s, 29-H), 3.78 (1H, dd, *J* 9.4 and 4.3, 2b-H), 3.84 (1H, dd, *J* 9.7 and 3.8, 20b-H), 3.94 (2H, d, *J* 5.5, 3-H), 4.00 (2H, d, *J* 5.9, 21-H), 4.25-4.29 (2H, m, 8-H, 14-H), 4.53 (1H, m, 1-H), 4.69 (1H, m, 19-H), 5.14-5.28 (4H, m, 5-H, 23-H), 5.35-5.45 (1H, dbr, Boc-N-H), 5.83 (2H, m, 22-H, 4-H), 6.88 (1H, dbr, N-H), 7.15-7.25 (2H, m, N-H).

**13C NMR** (75 MHz, CDCl3): d = 17.03 (q, C-16), 19.29 (q, C-17), 21.71 (q, C-11), 22.94 (q, C-12), 24.68 (d, C-10), 28.24 (3q, C-26, C-27, C-28), 35.05 (d, C-15), 40.10 (t, C-9), 51.56 (q, C-29), 52.48 (d, C-8), 52.63 (2d, C-1, C-19), 58.92 (d, C-14), 69.36 (2t, C-2, C-20), 72.15 (t, C-3), 72.31 ( t, C-21), 81.02 (s, C-25), 117.38 (t, C-5), 117.77 (t, C-23), 133.81 (d, C-4), 134.10 (d, C-22), 155.71 (s, C-24), 170.38 (s, C-18), 170.67 (2s, C-13, C-7), 171.72 (s, C-6).

**HMRS**: calcd for C29H51O9N4 [M+H]+), 599.3656; found, 599.3638; calcd for C29H50O9N4Na [M+Na]+), 621.3475; found, 621.3456.

**17: 17** was obtained according to **15** in a 0.5 mmol scale. Flash chromatography (silica, hexanes/EtOAc, 1:9) provided **17** in 73% yield as a colorless oil. []D20 = 27.5° (c 1, CHCl3). **HPLC** (Daicel OD-H, hexane/isopropanol 95/5, 0.5 ml/min): tR1 = 49.40, tR2 = 60.18 min (mixture of rotamers).

**1H NMR** (300 MHz, CDCl3):  = 0.90 (3H, d, *J* 6.3, 16-H), 0.94 (3H, d, *J* 6.4, 17-H), 1.40, 1.41 (9H, 2s, 26-H, 27-H, 28-H), 1.97-2.04 (4H, m, 10-H, 11-H), 2.22 (1H, m, 15-H), 3.50-3.83 (6H, m, 3-H, 12-H, 20-H), 3.70 (3H, s, 7-H), 3.92-3.98 (4H, m, 4-H, 21-H), 4.31 (1H, m, 14-H), 4.50-4.65 (3H, m, 2-H, 9-H, 19-H), 5.18 (4H, ddd, *J* 17.3, 10.5 and 1.5, 6-H, 23-H), 5.80 (2H, ddt, *J* 17.2, 10.6 and 5.5, 5-H, 22-H), 6.93 (1H, d, *J* 8.8, N-H), 7.09 (1H, dbr, N-H), 7.21 (1H, d, *J* 8.1, N-H).

**13C NMR** (75 MHz, CDCl3) mixture of rotamers (ratio 2 :1):  = 17.41*, 17.56 (2q, C-16), 19.15*, 19.31 (2q, C-17), 24.31, 24.73* (2t, C-11), 27.38*, 28.46 (2t, C-10), 28.05 (3q, C-26, C-27, C-28), 30.67, 31.38* (2d, C-15), 47.17, 47.39* (2t, C-12), 52.34 (q, C-7), 53.86 (d, C-9), 55.45*, 55.91 (2d, C-14), 59.53*, 60.05 (4d, C-2,C-19), 69.44, 69.51* (4t, C-3, C-20), 71.88, 71.94* (4t, C-4, C-21), 79.77 (s, C-25), 117.10, 117.13, 117.19, 117.26 (4t, C-6, C-23), 133.88, 133.97* (4d, C-5, C-22), 155.31 (s, C-24), 169.98, 170.03, 170.31, 170.60, 170.78, 170.86, 171.02 (7s, C-1, C-8, C-13, C-18).

**EA:** C28H46N4O9 (582.70) calcd.: C 57.72 H 7.96 N 9.62; found: C 57.75 H 8.01 N 9.49.

**HMRS**: calcd for C28H47N4O9 [M+H]+), 583.3343; found, 583.3397; calcd for C28H46N4O9Na [M+Na]+), 605.3162; found, 605.3210.

**19: 19** was obtained according to **15** in a 1 mmol scale. Flash chromatography (silica, hexanes/EtOAc, 3:7) provided **19** in 60% yield as a colorless solid, mp. 95-96°C. []D20 = 12.0° (c 0.6, CHCl3).

**1H NMR** (300 MHz, CDCl3):  = 0.89-0.99 (12H, m, 11-H, 12-H, 16-H, 17-H), 1.43 (9H, s, 26-H, 27-H, 28-H), 1.45-1.58 (3H, m, 9-H, 10-H), 2.02 (1H, bs, O-H), 2.39 (1H, m, 15-H), 3.68 (2H, m, 20-H), 3.91 (1H, m, 8-H), 4.09 (2H, m, 21-H), 4.16 (2H, m, 4-H), 4.22 (1H, m, 14-H), 4.63-4.66 (4H, m, 2-H, 3-H, 19-H), 5.19-5.35 (4H, m, 6-H, 23-H), 5.46 (1H, dbr, Boc-N-H), 5.77-5.94 (2H, m, 5-H, 22-H), 6.70 (1H, dbr, N-H), 7.01 (1H, dbr, N-H), 7.29 (1H, dbr, N-H).

**13C NMR** (75 MHz, CDCl3): d = 17.16 (q, C-16), 19.30 (q, C-17), 21.70 (q, C-11), 22.96 (q, C-12), 24.72 (d, C-10), 28.18 (3q, C-26, C-27, C-28), 29.01 (d, C-15), 39.30 (t, C-9), 51.27 (d, C-2), 55.27 (d, C-8), 56.09 (d, C-19), 59.90 (d, C-14), 62.74 (t, C-3), 66.11 (t, C-4), 68.44 (t, C-20), 72.32 (t, C-21), 81.50 (s, C-25), 118.28 (2t, C-6, C-23), 131.72 (d, C-5), 133.42 (d, C-22), 155.81 (s, C-24), 169.65 (s, C-18), 170.62 (s, C-13), 171.94 (s, C-7), 172.02 (s, C-1).

**EA:** C28H48O9N4 (584.431) calcd.: C 57.52 H 8.27 N 9.58; found: C 56.89 H 8.25 N 9.37.

**HMRS**: calcd for C28H49O9N4 [M+H]+), 585.3500; found, 585.3505; calcd for C28H48O9N4Na [M+Na]+), 607.3319; found, 607.3340.

**Xray –Data**

Cyclopeptide **27:**

Table 1. Crystal data and structure refinement for **27**.

Identification code shelxs1844

Empirical formula C24 H33 N3 O7

Formula weight 475.53

Temperature 293(2) K

Wavelength 0.71073 Å

Crystal system Orthorhombic

Space group P2(1)2(1)2(1)

Unit cell dimensions a = 10.967(2) Å = 90°.

b = 14.024(3) Å = 90°.

c = 16.422(3) Å  = 90°.

Volume 2525.7(8) Å3

Z 4

Density (calculated) 1.251 Mg/m3

Absorption coefficient 0.092 mm-1

F(000) 1016

Crystal size 0.3 x 0.23 x 0.18 mm3

Theta range for data collection 1.91 to 24.20°.

Index ranges -12<=h<=12, -15<=k<=16, -18<=l<=18

Reflections collected 15951

Independent reflections 3960 [R(int) = 0.0881]

Completeness to theta = 24.20° 98.2 %

Absorption correction N/A

Refinement method Full-matrix least-squares on F2

Data / restraints / parameters 3960 / 0 / 307

Goodness-of-fit on F2 0.947

Final R indices [I>2sigma(I)] R1 = 0.0647, wR2 = 0.1538

R indices (all data) R1 = 0.1221, wR2 = 0.1809

Absolute structure parameter -1(2)

Largest diff. peak and hole 0.611 and -0.239 e.Å-3

Table 2. Atomic coordinates ( x 104) and equivalent isotropic displacement parameters (Å2x 103) for **27**. U(eq) is defined as one third of the trace of the orthogonalized Uij tensor.

___________________________________________________________________________

x y z U(eq)

___________________________________________________________________________

O(1) 1330(3) 10955(3) 4314(2) 52(1)

O(2) -2608(4) 11486(5) 2752(4) 120(2)

O(3) -1156(4) 10978(5) 1960(3) 112(2)

O(4) 211(3) 8873(3) -7(2) 58(1)

O(5) 183(4) 8466(3) 1339(2) 66(1)

O(6) 1816(3) 10366(2) 1638(2) 44(1)

O(7) -1057(4) 8351(4) 4022(3) 82(1)

N(1) 532(3) 10895(3) 3048(3) 42(1)

N(2) 1952(4) 8822(3) 679(2) 51(1)

N(3) 2812(4) 9727(3) 2726(2) 39(1)

C(1) 2722(4) 10619(3) 3218(3) 38(1)

C(2) 1466(5) 10818(3) 3580(3) 41(1)

C(3) -681(4) 11146(5) 3335(3) 57(2)

C(4) -1592(6) 11173(6) 2667(4) 81(2)

C(5) -1919(7) 10949(7) 1184(6) 111(3)

C(6) -1335(10) 10296(6) 640(6) 114(3)

C(7) -1706(8) 9525(8) 369(6) 116(4)

C(8) -1104(6) 8802(6) -10(4) 84(2)

C(9) 748(5) 8701(4) 734(3) 54(2)

C(10) 2683(5) 8802(4) 1418(3) 50(1)

C(11) 4033(5) 8822(6) 1187(4) 72(2)

C(12) 2390(4) 9692(4) 1941(3) 41(1)

C(13) 3226(5) 8865(4) 3194(3) 46(1)

C(14) 4521(5) 8962(5) 3498(4) 58(2)

C(15) 2283(5) 8653(4) 3859(3) 46(1)

C(16) 2582(6) 8591(4) 4683(3) 62(2)

C(17) 1656(7) 8425(5) 5254(4) 71(2)

C(18) 465(7) 8344(5) 5026(4) 69(2)

C(19) 167(6) 8415(4) 4202(4) 58(2)

C(20) 1056(5) 8552(4) 3618(3) 52(1)

C(21) -1404(6) 8397(6) 3198(4) 84(2)

C(22) 3242(4) 11509(4) 2798(3) 44(1)

C(23) 4570(5) 11344(5) 2526(4) 64(2)

C(24) 3152(6) 12378(4) 3363(4) 58(2)

___________________________________________________________________________

Table 3. Bond lengths [Å] and angles [°] for **27**.

___________________________________________________________________________

O(1)-C(2) 1.229(6)

O(2)-C(4) 1.205(8)

O(3)-C(4) 1.287(8)

O(3)-C(5) 1.524(9)

O(4)-C(9) 1.373(6)

O(4)-C(8) 1.446(7)

O(5)-C(9) 1.216(7)

O(6)-C(12) 1.240(6)

O(7)-C(19) 1.378(7)

O(7)-C(21) 1.407(8)

N(1)-C(2) 1.351(6)

N(1)-C(3) 1.455(6)

N(2)-C(9) 1.334(7)

N(2)-C(10) 1.455(6)

N(3)-C(12) 1.372(6)

N(3)-C(1) 1.493(6)

N(3)-C(13) 1.502(6)

C(1)-C(2) 1.526(7)

C(1)-C(22) 1.536(7)

C(3)-C(4) 1.485(8)

C(5)-C(6) 1.432(12)

C(6)-C(7) 1.237(11)

C(7)-C(8) 1.361(11)

C(10)-C(11) 1.529(8)

C(10)-C(12) 1.548(7)

C(13)-C(14) 1.512(7)

C(13)-C(15) 1.533(7)

C(15)-C(16) 1.394(7)

C(15)-C(20) 1.410(8)

C(16)-C(17) 1.403(9)

C(17)-C(18) 1.363(10)

C(18)-C(19) 1.395(9)

C(19)-C(20) 1.381(8)

C(22)-C(24) 1.535(7)

C(22)-C(23) 1.541(7)

C(4)-O(3)-C(5) 123.8(5)

C(9)-O(4)-C(8) 114.8(4)

C(19)-O(7)-C(21) 117.9(5)

C(2)-N(1)-C(3) 120.2(4)

C(9)-N(2)-C(10) 119.1(4)

C(12)-N(3)-C(1) 121.1(4)

C(12)-N(3)-C(13) 123.6(4)

C(1)-N(3)-C(13) 114.7(4)

N(3)-C(1)-C(2) 115.1(4)

N(3)-C(1)-C(22) 114.4(4)

C(2)-C(1)-C(22) 111.2(4)

O(1)-C(2)-N(1) 122.1(5)

O(1)-C(2)-C(1) 121.3(5)

N(1)-C(2)-C(1) 116.5(5)

N(1)-C(3)-C(4) 112.5(5)

O(2)-C(4)-O(3) 121.7(6)

O(2)-C(4)-C(3) 123.1(6)

O(3)-C(4)-C(3) 114.3(5)

C(6)-C(5)-O(3) 107.0(6)

C(7)-C(6)-C(5) 129.6(11)

C(6)-C(7)-C(8) 131.0(10)

C(7)-C(8)-O(4) 115.6(7)

O(5)-C(9)-N(2) 126.4(5)

O(5)-C(9)-O(4) 123.5(5)

N(2)-C(9)-O(4) 110.0(5)

N(2)-C(10)-C(11) 109.0(4)

N(2)-C(10)-C(12) 109.4(4)

C(11)-C(10)-C(12) 108.9(5)

O(6)-C(12)-N(3) 121.4(5)

O(6)-C(12)-C(10) 119.9(4)

N(3)-C(12)-C(10) 118.7(4)

N(3)-C(13)-C(14) 112.3(5)

N(3)-C(13)-C(15) 108.5(4)

C(14)-C(13)-C(15) 114.6(4)

C(16)-C(15)-C(20) 119.4(5)

C(16)-C(15)-C(13) 123.0(5)

C(20)-C(15)-C(13) 117.6(4)

C(15)-C(16)-C(17) 119.2(6)

C(18)-C(17)-C(16) 121.6(6)

C(17)-C(18)-C(19) 119.0(6)

O(7)-C(19)-C(20) 123.2(5)

O(7)-C(19)-C(18) 115.6(6)

C(20)-C(19)-C(18) 121.2(6)

C(19)-C(20)-C(15) 119.5(5)

C(1)-C(22)-C(24) 110.5(4)

C(1)-C(22)-C(23) 111.1(4)

C(24)-C(22)-C(23) 110.9(4)

__________________________________

Table 4. Anisotropic displacement parameters (Å2x 103) for **27**. The anisotropic

displacement factor exponent takes the form: -22[ h2 a*2U11 + ... + 2 h k a* b* U12 ]

___________________________________________________________________________

U11 U22 U33 U23 U13 U12

___________________________________________________________________________

O(1) 56(2) 66(3) 35(2) -5(2) 4(2) 3(2)

O(2) 56(3) 187(6) 116(4) -40(5) -6(3) 25(4)

O(3) 67(3) 192(6) 77(3) -57(4) -26(3) 39(3)

O(4) 55(2) 83(3) 36(2) 1(2) -3(2) -6(2)

O(5) 73(3) 84(3) 41(2) 2(2) 2(2) -13(2)

O(6) 46(2) 50(2) 36(2) 2(2) -5(2) 10(2)

O(7) 72(3) 95(4) 78(3) 2(3) 6(2) -28(3)

N(1) 35(2) 52(3) 39(2) -9(2) 0(2) 7(2)

N(2) 58(3) 66(3) 29(2) -10(2) 0(2) 7(2)

N(3) 47(2) 40(2) 31(2) 1(2) -4(2) 11(2)

C(1) 39(3) 39(3) 35(3) 0(2) -2(2) 3(2)

C(2) 44(3) 33(3) 46(3) 0(2) 1(2) -5(2)

C(3) 39(3) 74(4) 57(4) -8(3) 3(3) -3(3)

C(4) 41(4) 126(6) 76(5) -27(5) -8(3) 24(4)

C(5) 90(6) 119(7) 125(7) -14(6) -34(5) 48(5)

C(6) 143(8) 57(5) 142(8) -1(6) 11(7) -16(6)

C(7) 72(5) 148(9) 128(8) -61(7) -27(5) 26(6)

C(8) 65(4) 139(8) 49(4) -6(5) -6(3) -26(5)

C(9) 66(4) 62(4) 34(3) -8(3) -1(3) -1(3)

C(10) 63(3) 54(4) 32(3) -6(3) -5(2) 15(3)

C(11) 62(4) 108(6) 47(4) -23(4) -11(3) 33(4)

C(12) 41(3) 45(3) 37(3) 1(3) 3(2) 1(2)

C(13) 60(3) 39(3) 39(3) 4(3) -10(2) 9(3)

C(14) 57(3) 63(4) 53(3) 0(3) -13(3) 17(3)

C(15) 63(4) 37(3) 40(3) 5(2) -1(3) -2(3)

C(16) 88(4) 53(4) 44(3) 2(3) -13(3) -6(3)

C(17) 103(6) 78(5) 33(3) 10(3) -1(3) -16(4)

C(18) 100(5) 65(4) 43(4) 7(3) 12(4) -22(4)

C(19) 64(4) 54(4) 56(4) 4(3) 4(3) -11(3)

C(20) 68(4) 53(3) 36(3) 2(3) -5(3) -9(3)

C(21) 72(4) 99(6) 81(5) -12(4) -14(4) -17(4)

C(22) 43(3) 41(3) 46(3) 0(3) -5(2) 0(2)

C(23) 48(3) 67(4) 78(4) 11(3) 15(3) -5(3)

C(24) 74(4) 43(3) 58(4) -2(3) -10(3) -16(3)

___________________________________________________________________________

Cyclopeptide **28:**


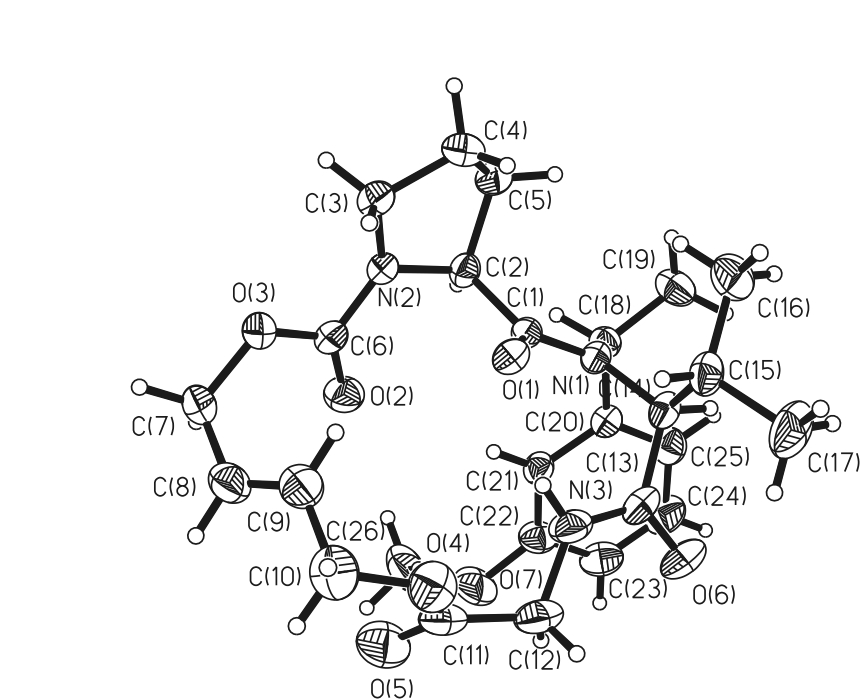


Table 1. Crystal data and structure refinement for **28**.

Identification code shelxs1891

Empirical formula C26 H35 N3 O7

Formula weight 501.57

Temperature 293(2) K

Wavelength 0.71073 Å

Crystal system Monoclinic

Space group P2(1)

Unit cell dimensions a = 10.131(2) Å = 90°.

b = 20.904(4) Å = 92.53(3)°.

c = 12.459(2) Å  = 90°.

Volume 2636.0(8) Å3

Z 4

Density (calculated) 1.264 Mg/m3

Absorption coefficient 0.092 mm-1

F(000) 1072

Crystal size 0.2 x 0.18 x 0.13 mm3

Theta range for data collection 1.95 to 24.31°.

Index ranges -11<=h<=11, -23<=k<=23, -14<=l<=14

Reflections collected 16604

Independent reflections 8015 [R(int) = 0.0593]

Completeness to theta = 24.31° 96.3 %

Absorption correction N/A

Refinement method Full-matrix least-squares on F2

Data / restraints / parameters 8015 / 1 / 649

Goodness-of-fit on F2 1.008

Final R indices [I>2sigma(I)] R1 = 0.0359, wR2 = 0.0845

R indices (all data) R1 = 0.0439, wR2 = 0.0883

Absolute structure parameter -0.4(6)

Largest diff. peak and hole 0.129 and -0.137 e.Å-3

Table 2. Atomic coordinates ( x 104) and equivalent isotropic displacement parameters (Å2x 103) for **28**. U(eq) is defined as one third of the trace of the orthogonalized Uij tensor.

___________________________________________________________________________

x y z U(eq)

___________________________________________________________________________

O(1) 3333(1) 8033(1) 2810(1) 38(1)

N(1) 2395(2) 8334(1) 4364(1) 33(1)

C(1) 2697(2) 8427(1) 3326(2) 33(1)

C(2) 2184(2) 9027(1) 2724(2) 37(1)

N(2) 2904(2) 9108(1) 1739(1) 38(1)

C(3) 2249(2) 8799(1) 803(2) 45(1)

C(4) 962(2) 8552(1) 1238(2) 52(1)

C(5) 774(2) 8927(1) 2261(2) 48(1)

C(6) 4183(2) 9286(1) 1808(2) 42(1)

O(2) 4752(2) 9475(1) 2628(1) 53(1)

O(3) 4734(2) 9246(1) 833(1) 57(1)

C(7) 6124(2) 9407(1) 826(2) 60(1)

C(8) 6970(2) 8867(1) 1216(2) 55(1)

C(9) 6571(3) 8296(1) 1476(2) 56(1)

C(10) 7452(3) 7775(1) 1889(2) 65(1)

O(4) 6948(2) 7530(1) 2892(2) 65(1)

O(5) 7932(2) 8341(1) 3763(2) 81(1)

C(11) 7212(2) 7889(1) 3758(2) 55(1)

C(12) 6477(2) 7660(2) 4717(2) 64(1)

N(3) 5062(2) 7691(1) 4486(2) 52(1)

C(13) 4189(2) 7662(1) 5276(2) 43(1)

O(6) 4532(2) 7574(1) 6216(1) 63(1)

C(14) 2730(2) 7719(1) 4916(2) 39(1)

C(15) 2222(2) 7115(1) 4314(2) 47(1)

C(16) 771(3) 7165(1) 3982(2) 66(1)

C(17) 2446(3) 6530(1) 5037(3) 79(1)

C(18) 1827(2) 8841(1) 5057(2) 37(1)

C(19) 437(2) 8676(1) 5411(2) 56(1)

C(20) 2809(2) 8991(1) 5981(2) 36(1)

C(21) 4033(2) 9241(1) 5705(2) 39(1)

C(22) 4973(2) 9381(1) 6505(2) 48(1)

C(23) 4707(3) 9280(1) 7578(2) 57(1)

C(24) 3517(3) 9037(1) 7843(2) 60(1)

C(25) 2554(2) 8894(1) 7056(2) 49(1)

O(7) 6197(2) 9626(1) 6315(2) 73(1)

C(26) 6543(3) 9699(2) 5220(3) 86(1)

N(4) 7558(2) 6413(1) -1558(1) 33(1)

C(27) 7922(2) 6262(1) -529(2) 33(1)

O(8) 8563(1) 6631(1) 65(1) 41(1)

C(28) 7490(2) 5621(1) -57(2) 37(1)

N(5) 8305(2) 5464(1) 891(1) 40(1)

C(29) 7739(2) 5674(1) 1895(2) 47(1)

C(30) 6391(2) 5930(1) 1544(2) 55(1)

C(31) 6115(2) 5662(1) 418(2) 47(1)

C(32) 9542(2) 5250(1) 780(2) 45(1)

O(9) 10031(2) 5119(1) -72(2) 60(1)

O(10) 10164(2) 5194(1) 1763(1) 60(1)

C(33) 11557(2) 5064(2) 1742(3) 72(1)

C(34) 12332(3) 5646(1) 1534(2) 67(1)

C(35) 11890(3) 6229(1) 1421(2) 60(1)

C(36) 12711(3) 6789(1) 1154(2) 72(1)

O(11) 12153(2) 7103(1) 185(2) 67(1)

C(37) 12394(2) 6833(1) -751(2) 57(1)

O(12) 13118(2) 6381(1) -852(2) 85(1)

C(38) 11624(2) 7146(2) -1657(2) 68(1)

N(6) 10218(2) 7070(1) -1496(2) 53(1)

C(39) 9323(2) 7129(1) -2311(2) 45(1)

O(13) 9625(2) 7262(1) -3227(1) 67(1)

C(40) 7865(2) 7051(1) -2022(2) 40(1)

C(41) 7382(2) 7628(1) -1362(2) 49(1)

C(42) 5924(2) 7569(1) -1121(2) 61(1)

C(43) 7636(4) 8244(1) -1980(3) 81(1)

C(44) 6860(2) 5958(1) -2311(2) 35(1)

C(45) 5455(2) 6161(1) -2588(2) 50(1)

C(46) 7701(2) 5828(1) -3274(2) 36(1)

C(47) 7194(2) 5865(1) -4320(2) 51(1)

C(48) 7964(3) 5710(2) -5170(2) 67(1)

C(49) 9233(3) 5509(1) -5003(2) 64(1)

C(50) 9768(2) 5467(1) -3960(2) 51(1)

C(51) 9006(2) 5626(1) -3102(2) 40(1)

O(14) 11039(2) 5248(1) -3866(2) 73(1)

C(52) 11726(3) 5304(2) -2849(3) 82(1)

___________________________________________________________________________ Table 3. Bond lengths [Å] and angles [°] for **28**.

_______________________________________________________________________

O(1)-C(1) 1.241(2)

N(1)-C(1) 1.356(3)

N(1)-C(14) 1.491(3)

N(1)-C(18) 1.497(3)

C(1)-C(2) 1.540(3)

C(2)-N(2) 1.465(3)

C(2)-C(5) 1.531(3)

N(2)-C(6) 1.346(3)

N(2)-C(3) 1.466(3)

C(3)-C(4) 1.523(3)

C(4)-C(5) 1.515(4)

C(6)-O(2) 1.217(3)

C(6)-O(3) 1.363(3)

O(3)-C(7) 1.447(3)

C(7)-C(8) 1.485(4)

C(8)-C(9) 1.307(4)

C(9)-C(10) 1.485(4)

C(10)-O(4) 1.463(3)

O(4)-C(11) 1.331(3)

O(5)-C(11) 1.193(3)

C(11)-C(12) 1.513(4)

C(12)-N(3) 1.451(3)

N(3)-C(13) 1.354(3)

C(13)-O(6) 1.220(2)

C(13)-C(14) 1.530(3)

C(14)-C(15) 1.544(3)

C(15)-C(16) 1.513(4)

C(15)-C(17) 1.530(3)

C(18)-C(20) 1.520(3)

C(18)-C(19) 1.534(3)

C(20)-C(25) 1.391(3)

C(20)-C(21) 1.402(3)

C(21)-C(22) 1.378(3)

C(22)-O(7) 1.372(3)

C(22)-C(23) 1.392(4)

C(23)-C(24) 1.363(4)

C(24)-C(25) 1.385(4)

O(7)-C(26) 1.432(4)

N(4)-C(27) 1.355(2)

N(4)-C(40) 1.491(3)

N(4)-C(44) 1.492(3)

C(27)-O(8) 1.235(2)

C(27)-C(28) 1.535(3)

C(28)-N(5) 1.449(2)

C(28)-C(31) 1.539(3)

N(5)-C(32) 1.344(3)

N(5)-C(29) 1.466(3)

C(29)-C(30) 1.513(3)

C(30)-C(31) 1.525(3)

C(32)-O(9) 1.222(3)

C(32)-O(10) 1.358(3)

O(10)-C(33) 1.438(3)

C(33)-C(34) 1.477(4)

C(34)-C(35) 1.304(4)

C(35)-C(36) 1.481(4)

C(36)-O(11) 1.466(3)

O(11)-C(37) 1.328(3)

C(37)-O(12) 1.205(3)

C(37)-C(38) 1.495(4)

C(38)-N(6) 1.456(3)

N(6)-C(39) 1.337(3)

C(39)-O(13) 1.226(3)

C(39)-C(40) 1.544(3)

C(40)-C(41) 1.551(3)

C(41)-C(42) 1.525(4)

C(41)-C(43) 1.528(4)

C(44)-C(45) 1.511(3)

C(44)-C(46) 1.526(3)

C(46)-C(47) 1.381(3)

C(46)-C(51) 1.396(3)

C(47)-C(48) 1.382(4)

C(48)-C(49) 1.360(4)

C(49)-C(50) 1.388(4)

C(50)-O(14) 1.368(3)

C(50)-C(51) 1.386(3)

O(14)-C(52) 1.423(4)

C(1)-N(1)-C(14) 120.44(16)

C(1)-N(1)-C(18) 123.89(16)

C(14)-N(1)-C(18) 115.47(16)

O(1)-C(1)-N(1) 122.88(17)

O(1)-C(1)-C(2) 117.35(17)

N(1)-C(1)-C(2) 119.69(18)

N(2)-C(2)-C(5) 101.03(16)

N(2)-C(2)-C(1) 109.40(16)

C(5)-C(2)-C(1) 111.22(17)

C(6)-N(2)-C(2) 119.45(17)

C(6)-N(2)-C(3) 124.97(19)

C(2)-N(2)-C(3) 113.00(16)

N(2)-C(3)-C(4) 103.34(18)

C(5)-C(4)-C(3) 105.41(19)

C(4)-C(5)-C(2) 103.72(18)

O(2)-C(6)-N(2) 124.3(2)

O(2)-C(6)-O(3) 124.8(2)

N(2)-C(6)-O(3) 110.93(19)

C(6)-O(3)-C(7) 115.35(18)

O(3)-C(7)-C(8) 111.7(2)

C(9)-C(8)-C(7) 126.5(2)

C(8)-C(9)-C(10) 124.6(2)

O(4)-C(10)-C(9) 109.0(2)

C(11)-O(4)-C(10) 115.4(2)

O(5)-C(11)-O(4) 123.5(3)

O(5)-C(11)-C(12) 124.6(3)

O(4)-C(11)-C(12) 111.9(2)

N(3)-C(12)-C(11) 110.22(19)

C(13)-N(3)-C(12) 121.75(19)

O(6)-C(13)-N(3) 122.4(2)

O(6)-C(13)-C(14) 121.6(2)

N(3)-C(13)-C(14) 115.96(17)

N(1)-C(14)-C(13) 113.57(17)

N(1)-C(14)-C(15) 114.64(16)

C(13)-C(14)-C(15) 112.07(18)

C(16)-C(15)-C(17) 109.5(2)

C(16)-C(15)-C(14) 112.1(2)

C(17)-C(15)-C(14) 109.22(19)

N(1)-C(18)-C(20) 109.13(16)

N(1)-C(18)-C(19) 112.82(18)

C(20)-C(18)-C(19) 114.00(19)

C(25)-C(20)-C(21) 119.6(2)

C(25)-C(20)-C(18) 123.77(19)

C(21)-C(20)-C(18) 116.62(18)

C(22)-C(21)-C(20) 119.5(2)

O(7)-C(22)-C(21) 123.8(2)

O(7)-C(22)-C(23) 115.9(2)

C(21)-C(22)-C(23) 120.3(2)

C(24)-C(23)-C(22) 120.0(2)

C(23)-C(24)-C(25) 120.8(2)

C(24)-C(25)-C(20) 119.7(2)

C(22)-O(7)-C(26) 117.7(2)

C(27)-N(4)-C(40) 121.51(16)

C(27)-N(4)-C(44) 123.21(16)

C(40)-N(4)-C(44) 115.27(15)

O(8)-C(27)-N(4) 122.39(18)

O(8)-C(27)-C(28) 117.83(16)

N(4)-C(27)-C(28) 119.75(17)

N(5)-C(28)-C(27) 110.46(16)

N(5)-C(28)-C(31) 101.05(16)

C(27)-C(28)-C(31) 112.20(17)

C(32)-N(5)-C(28) 119.47(18)

C(32)-N(5)-C(29) 126.14(17)

C(28)-N(5)-C(29) 113.38(17)

N(5)-C(29)-C(30) 103.98(17)

C(29)-C(30)-C(31) 105.20(19)

C(30)-C(31)-C(28) 103.98(17)

O(9)-C(32)-N(5) 125.48(19)

O(9)-C(32)-O(10) 125.1(2)

N(5)-C(32)-O(10) 109.5(2)

C(32)-O(10)-C(33) 114.6(2)

O(10)-C(33)-C(34) 112.2(2)

C(35)-C(34)-C(33) 127.3(3)

C(34)-C(35)-C(36) 124.7(3)

O(11)-C(36)-C(35) 109.8(2)

C(37)-O(11)-C(36) 116.9(2)

O(12)-C(37)-O(11) 124.2(3)

O(12)-C(37)-C(38) 124.3(3)

O(11)-C(37)-C(38) 111.5(2)

N(6)-C(38)-C(37) 109.2(2)

C(39)-N(6)-C(38) 121.3(2)

O(13)-C(39)-N(6) 122.6(2)

O(13)-C(39)-C(40) 121.4(2)

N(6)-C(39)-C(40) 115.9(2)

N(4)-C(40)-C(39) 113.77(17)

N(4)-C(40)-C(41) 114.39(17)

C(39)-C(40)-C(41) 111.65(18)

C(42)-C(41)-C(43) 110.7(2)

C(42)-C(41)-C(40) 111.94(19)

C(43)-C(41)-C(40) 108.9(2)

N(4)-C(44)-C(45) 112.35(17)

N(4)-C(44)-C(46) 110.03(16)

C(45)-C(44)-C(46) 115.08(16)

C(47)-C(46)-C(51) 118.2(2)

C(47)-C(46)-C(44) 122.27(19)

C(51)-C(46)-C(44) 119.40(17)

C(46)-C(47)-C(48) 120.7(2)

C(49)-C(48)-C(47) 121.2(2)

C(48)-C(49)-C(50) 119.3(2)

O(14)-C(50)-C(51) 124.6(2)

O(14)-C(50)-C(49) 115.4(2)

C(51)-C(50)-C(49) 120.0(2)

C(50)-C(51)-C(46) 120.6(2)

C(50)-O(14)-C(52) 118.0(2)

__________________________________

Table 4. Anisotropic displacement parameters (Å2x 103) for **28**. The anisotropic

displacement factor exponent takes the form: -22[ h2 a*2U11 + ... + 2 h k a* b* U12 ]

___________________________________________________________________________

U11 U22 U33 U23 U13 U12

___________________________________________________________________________

O(1) 45(1) 37(1) 33(1) 0(1) -1(1) 4(1)

N(1) 38(1) 31(1) 30(1) 2(1) 0(1) -2(1)

C(1) 33(1) 32(1) 32(1) 2(1) -3(1) -5(1)

C(2) 41(1) 32(1) 37(1) 5(1) 3(1) 1(1)

N(2) 36(1) 43(1) 34(1) 10(1) -3(1) -4(1)

C(3) 47(1) 50(1) 38(1) 7(1) -5(1) -2(1)

C(4) 39(1) 63(2) 52(1) 2(1) -10(1) -4(1)

C(5) 40(1) 54(1) 49(1) 11(1) -2(1) 6(1)

C(6) 41(1) 43(1) 42(1) 12(1) -4(1) 0(1)

O(2) 49(1) 53(1) 54(1) 0(1) -9(1) -7(1)

O(3) 40(1) 86(1) 43(1) 19(1) 1(1) -10(1)

C(7) 41(1) 86(2) 54(2) 18(1) 3(1) -16(1)

C(8) 42(1) 74(2) 50(1) -4(1) 0(1) -10(1)

C(9) 53(1) 71(2) 44(1) -6(1) 1(1) -6(1)

C(10) 73(2) 63(2) 60(2) -10(1) 13(1) 1(1)

O(4) 72(1) 53(1) 68(1) -3(1) 2(1) -3(1)

O(5) 65(1) 95(2) 80(1) -7(1) -18(1) -21(1)

C(11) 40(1) 62(2) 61(2) 1(1) -16(1) 7(1)

C(12) 52(1) 80(2) 57(2) 10(1) -18(1) 10(1)

N(3) 47(1) 71(1) 37(1) 6(1) -10(1) 6(1)

C(13) 62(1) 33(1) 35(1) 4(1) -7(1) 4(1)

O(6) 80(1) 67(1) 40(1) 12(1) -15(1) 12(1)

C(14) 52(1) 35(1) 31(1) 4(1) 1(1) -3(1)

C(15) 61(1) 37(1) 44(1) 4(1) 3(1) -10(1)

C(16) 67(2) 58(2) 71(2) -2(1) -7(1) -23(1)

C(17) 116(3) 37(1) 82(2) 15(1) -9(2) -11(2)

C(18) 35(1) 40(1) 37(1) -1(1) 3(1) 0(1)

C(19) 40(1) 71(2) 57(2) -7(1) 5(1) -5(1)

C(20) 43(1) 32(1) 32(1) -2(1) 2(1) 2(1)

C(21) 45(1) 42(1) 31(1) 2(1) -1(1) -5(1)

C(22) 46(1) 45(1) 52(2) -6(1) -9(1) -3(1)

C(23) 62(2) 66(2) 43(1) -12(1) -14(1) 3(1)

C(24) 77(2) 75(2) 29(1) -4(1) 1(1) 9(2)

C(25) 53(1) 54(1) 40(1) -1(1) 10(1) 2(1)

O(7) 51(1) 92(2) 76(1) -4(1) -14(1) -26(1)

C(26) 61(2) 110(3) 87(2) 1(2) 9(2) -38(2)

N(4) 40(1) 33(1) 26(1) 1(1) -1(1) 0(1)

C(27) 32(1) 42(1) 26(1) -1(1) -1(1) 6(1)

O(8) 47(1) 45(1) 29(1) -2(1) -5(1) -4(1)

C(28) 42(1) 42(1) 27(1) 4(1) -6(1) 0(1)

N(5) 42(1) 49(1) 28(1) 4(1) -4(1) 6(1)

C(29) 54(1) 59(1) 28(1) -1(1) 0(1) -7(1)

C(30) 49(1) 64(2) 52(2) 1(1) 9(1) -1(1)

C(31) 41(1) 59(1) 42(1) 10(1) -3(1) -4(1)

C(32) 49(1) 45(1) 42(1) 6(1) -6(1) 3(1)

O(9) 57(1) 71(1) 54(1) -11(1) 3(1) 11(1)

O(10) 52(1) 78(1) 50(1) 15(1) -16(1) 8(1)

C(33) 51(2) 75(2) 89(2) 17(2) -26(1) 17(1)

C(34) 46(1) 72(2) 80(2) -4(2) -19(1) 12(1)

C(35) 61(2) 67(2) 51(2) -12(1) -9(1) 12(1)

C(36) 77(2) 68(2) 68(2) -16(2) -21(2) 3(2)

O(11) 77(1) 55(1) 67(1) -13(1) -6(1) 5(1)

C(37) 43(1) 68(2) 61(2) -6(1) 8(1) -14(1)

O(12) 66(1) 104(2) 87(2) -11(1) 20(1) 22(1)

C(38) 58(2) 82(2) 64(2) 9(2) 11(1) -20(2)

N(6) 46(1) 72(1) 42(1) 5(1) 4(1) -11(1)

C(39) 62(1) 35(1) 39(1) 2(1) 7(1) -7(1)

O(13) 84(1) 74(1) 44(1) 14(1) 11(1) -16(1)

C(40) 52(1) 35(1) 31(1) 5(1) -6(1) 2(1)

C(41) 64(1) 38(1) 42(1) -4(1) -10(1) 7(1)

C(42) 64(2) 59(2) 58(2) -13(1) -6(1) 18(1)

C(43) 116(3) 37(1) 89(2) 7(2) 3(2) 4(2)

C(44) 41(1) 37(1) 27(1) 0(1) -5(1) -2(1)

C(45) 41(1) 67(2) 41(1) -4(1) -6(1) 2(1)

C(46) 45(1) 30(1) 32(1) 1(1) 1(1) -5(1)

C(47) 54(1) 66(2) 33(1) -7(1) -3(1) -4(1)

C(48) 82(2) 89(2) 30(1) -10(1) 6(1) -9(2)

C(49) 84(2) 63(2) 48(2) -17(1) 27(1) -11(2)

C(50) 52(1) 37(1) 67(2) -6(1) 18(1) -2(1)

C(51) 49(1) 35(1) 37(1) 2(1) 4(1) 0(1)

O(14) 58(1) 70(1) 92(2) -7(1) 27(1) 8(1)

C(52) 48(2) 96(2) 102(3) 25(2) 12(2) 6(2)

___________________________________________________________________________

Cyclopeptide **29:**

Table 1. Crystal data and structure refinement for **29**.

Identification code shelxs1804

Empirical formula C26 H37 N3 O7

Formula weight 503.59

Temperature 293(2) K

Wavelength 0.71073 Å

Crystal system Orthorhombic

Space group P2(1)2(1)2(1)

Unit cell dimensions a = 9.491(2) Å = 90°.

b = 9.730(2) Å = 90°.

c = 28.504(6) Å  = 90°.

Volume 2632.3(10) Å3

Z 4

Density (calculated) 1.271 Mg/m3

Absorption coefficient 0.092 mm-1

F(000) 1080

Crystal size 0.33 x 0.26 x 0.18 mm3

Theta range for data collection 2.21 to 24.02°.

Index ranges -10<=h<=10, -11<=k<=11, -32<=l<=32

Reflections collected 16007

Independent reflections 3960 [R(int) = 0.0693]

Completeness to theta = 24.02° 95.7 %

Absorption correction N/A

Refinement method Full-matrix least-squares on F2

Data / restraints / parameters 3960 / 0 / 333

Goodness-of-fit on F2 0.948

Final R indices [I>2sigma(I)] R1 = 0.0358, wR2 = 0.0665

R indices (all data) R1 = 0.0592, wR2 = 0.0737

Absolute structure parameter 1.1(11)

Largest diff. peak and hole 0.140 and -0.140 e.Å-3

Table 2. Atomic coordinates ( x 104) and equivalent isotropic displacement parameters (Å2x 103) for **29**. U(eq) is defined as one third of the trace of the orthogonalized Uij tensor.

___________________________________________________________________________

x y z U(eq)

___________________________________________________________________________

O(1) 2461(2) 1199(2) -1577(1) 34(1)

O(2) 3158(2) -1992(2) -1922(1) 42(1)

O(3) 5227(2) -1377(2) -2273(1) 39(1)

O(4) 1125(2) 1409(2) -2760(1) 48(1)

O(5) -216(3) -209(3) -3099(1) 75(1)

O(6) -2152(2) 344(2) -1513(1) 51(1)

O(7) -330(2) -445(2) 1145(1) 52(1)

N(1) 1222(2) -66(2) -1046(1) 24(1)

N(2) 4733(2) -594(2) -1553(1) 31(1)

N(3) -267(3) 983(3) -1940(1) 42(1)

C(1) 2433(3) 257(2) -1283(1) 26(1)

C(2) 3826(3) -438(2) -1142(1) 27(1)

C(3) 4550(3) 410(2) -753(1) 28(1)

C(4) 5030(3) 1839(3) -916(1) 40(1)

C(5) 5768(3) -395(3) -538(1) 39(1)

C(6) 4265(3) -1375(3) -1915(1) 34(1)

C(7) 4720(3) -1953(3) -2710(1) 45(1)

C(8) 3750(3) -1003(3) -2962(1) 47(1)

C(9) 3315(3) 192(3) -2818(1) 47(1)

C(10) 2318(3) 1107(3) -3075(1) 51(1)

C(11) 0(3) 592(3) -2789(1) 45(1)

C(12) -1021(3) 879(4) -2392(1) 57(1)

C(13) -908(3) 687(2) -1534(1) 29(1)

C(14) -28(3) 843(2) -1081(1) 26(1)

C(15) 255(3) 2364(2) -952(1) 32(1)

C(16) 1058(4) 2484(3) -488(1) 51(1)

C(17) -1120(3) 3154(3) -914(1) 55(1)

C(18) 993(3) -1397(2) -790(1) 30(1)

C(19) -21(3) -2307(3) -1068(1) 46(1)

C(20) 572(3) -1179(2) -276(1) 28(1)

C(21) 1621(3) -966(2) 65(1) 34(1)

C(22) 1280(3) -734(3) 532(1) 40(1)

C(23) -120(3) -693(2) 676(1) 35(1)

C(24) -1173(3) -916(2) 347(1) 34(1)

C(25) -805(3) -1174(3) -123(1) 32(1)

C(26) -1743(3) -230(3) 1309(1) 52(1)

___________________________________________________________________________ Table 3. Bond lengths [Å] and angles [°] for **29**.

___________________________________________________________________________

O(1)-C(1) 1.243(3)

O(2)-C(6) 1.210(3)

O(3)-C(6) 1.368(3)

O(3)-C(7) 1.450(3)

O(4)-C(11) 1.334(4)

O(4)-C(10) 1.475(3)

O(5)-C(11) 1.194(3)

O(6)-C(13) 1.229(3)

O(7)-C(23) 1.374(3)

O(7)-C(26) 1.435(3)

N(1)-C(1) 1.368(3)

N(1)-C(14) 1.484(3)

N(1)-C(18) 1.502(3)

N(2)-C(6) 1.358(3)

N(2)-C(2) 1.461(3)

N(3)-C(13) 1.339(3)

N(3)-C(12) 1.476(3)

C(1)-C(2) 1.538(3)

C(2)-C(3) 1.543(3)

C(3)-C(5) 1.525(3)

C(3)-C(4) 1.535(3)

C(7)-C(8) 1.488(4)

C(8)-C(9) 1.300(4)

C(9)-C(10) 1.492(4)

C(11)-C(12) 1.517(4)

C(13)-C(14) 1.546(3)

C(14)-C(15) 1.548(3)

C(15)-C(17) 1.519(4)

C(15)-C(16) 1.532(3)

C(18)-C(19) 1.528(4)

C(18)-C(20) 1.533(3)

C(20)-C(25) 1.378(3)

C(20)-C(21) 1.407(3)

C(21)-C(22) 1.391(3)

C(22)-C(23) 1.390(4)

C(23)-C(24) 1.387(4)

C(24)-C(25) 1.407(3)

C(6)-O(3)-C(7) 114.8(2)

C(11)-O(4)-C(10) 117.2(2)

C(23)-O(7)-C(26) 118.5(2)

C(1)-N(1)-C(14) 120.18(18)

C(1)-N(1)-C(18) 123.97(19)

C(14)-N(1)-C(18) 115.45(18)

C(6)-N(2)-C(2) 118.4(2)

C(13)-N(3)-C(12) 121.3(3)

O(1)-C(1)-N(1) 121.3(2)

O(1)-C(1)-C(2) 118.8(2)

N(1)-C(1)-C(2) 119.53(19)

N(2)-C(2)-C(1) 110.10(18)

N(2)-C(2)-C(3) 111.6(2)

C(1)-C(2)-C(3) 109.56(18)

C(5)-C(3)-C(4) 111.2(2)

C(5)-C(3)-C(2) 110.58(19)

C(4)-C(3)-C(2) 113.54(19)

O(2)-C(6)-N(2) 124.9(2)

O(2)-C(6)-O(3) 124.6(2)

N(2)-C(6)-O(3) 110.5(2)

O(3)-C(7)-C(8) 112.3(2)

C(9)-C(8)-C(7) 126.9(3)

C(8)-C(9)-C(10) 125.5(3)

O(4)-C(10)-C(9) 107.9(2)

O(5)-C(11)-O(4) 124.9(3)

O(5)-C(11)-C(12) 124.2(3)

O(4)-C(11)-C(12) 110.8(2)

N(3)-C(12)-C(11) 110.8(3)

O(6)-C(13)-N(3) 122.4(2)

O(6)-C(13)-C(14) 120.4(2)

N(3)-C(13)-C(14) 117.1(2)

N(1)-C(14)-C(13) 115.36(18)

N(1)-C(14)-C(15) 114.6(2)

C(13)-C(14)-C(15) 112.66(19)

C(17)-C(15)-C(16) 109.1(2)

C(17)-C(15)-C(14) 110.6(2)

C(16)-C(15)-C(14) 111.3(2)

N(1)-C(18)-C(19) 109.81(19)

N(1)-C(18)-C(20) 112.50(19)

C(19)-C(18)-C(20) 114.3(2)

C(25)-C(20)-C(21) 116.9(2)

C(25)-C(20)-C(18) 123.4(2)

C(21)-C(20)-C(18) 119.8(2)

C(22)-C(21)-C(20) 121.4(2)

C(23)-C(22)-C(21) 120.6(2)

O(7)-C(23)-C(24) 125.5(2)

O(7)-C(23)-C(22) 115.4(2)

C(24)-C(23)-C(22) 119.1(2)

C(23)-C(24)-C(25) 119.4(2)

C(20)-C(25)-C(24) 122.6(2)

__________________________________

Table 4. Anisotropic displacement parameters (Å2x 103) for **29**. The anisotropic

displacement factor exponent takes the form: -22[ h2 a*2U11 + ... + 2 h k a* b* U12 ]

___________________________________________________________________________

U11 U22 U33 U23 U13 U12

___________________________________________________________________________

O(1) 26(1) 45(1) 31(1) 12(1) 1(1) 3(1)

O(2) 37(1) 51(1) 38(1) -5(1) -1(1) -10(1)

O(3) 30(1) 58(1) 29(1) -10(1) 3(1) 4(1)

O(4) 43(2) 67(1) 34(1) -4(1) 1(1) -1(1)

O(5) 77(2) 93(2) 56(1) -26(1) 6(1) -24(1)

O(6) 22(1) 93(2) 37(1) -1(1) -1(1) -8(1)

O(7) 54(2) 68(1) 33(1) -7(1) 3(1) -5(1)

N(1) 19(1) 29(1) 23(1) 3(1) 1(1) 2(1)

N(2) 18(1) 45(1) 31(1) -5(1) 3(1) -5(1)

N(3) 24(2) 78(2) 25(1) 7(1) -6(1) -4(1)

C(1) 24(2) 32(1) 22(1) -2(1) -2(1) 1(1)

C(2) 23(2) 33(1) 25(1) 1(1) 3(1) 1(1)

C(3) 23(2) 36(2) 26(1) -1(1) 1(1) 2(1)

C(4) 39(2) 41(2) 40(2) -3(1) -5(1) -1(1)

C(5) 33(2) 46(2) 37(1) -2(1) -10(1) 6(1)

C(6) 34(2) 39(2) 29(1) 0(1) -1(1) 6(1)

C(7) 45(2) 60(2) 30(1) -16(1) 3(1) 5(2)

C(8) 48(2) 67(2) 27(1) -10(1) 0(1) 2(2)

C(9) 46(2) 59(2) 35(2) 1(2) -2(1) -2(2)

C(10) 46(2) 74(2) 33(1) 7(2) 7(1) 2(2)

C(11) 41(2) 63(2) 31(2) 4(1) -7(1) 2(2)

C(12) 36(2) 104(3) 29(1) 2(2) -8(1) 6(2)

C(13) 21(2) 39(2) 27(1) 0(1) -1(1) 4(1)

C(14) 19(2) 36(1) 22(1) 3(1) 1(1) 4(1)

C(15) 31(2) 34(2) 32(1) 2(1) 1(1) 1(1)

C(16) 58(2) 45(2) 48(2) -16(1) -11(2) 10(2)

C(17) 44(2) 48(2) 74(2) -2(2) -6(2) 14(2)

C(18) 28(2) 30(2) 33(1) 4(1) 3(1) 1(1)

C(19) 49(2) 43(2) 47(2) -10(1) 3(2) -10(2)

C(20) 25(2) 27(1) 31(1) 8(1) 0(1) -1(1)

C(21) 26(2) 37(2) 39(2) 11(1) 0(1) -3(1)

C(22) 36(2) 47(2) 36(2) 5(1) -11(1) -9(1)

C(23) 40(2) 34(1) 29(1) 6(1) 1(1) -5(1)

C(24) 26(2) 37(2) 38(1) 9(1) 5(1) 1(1)

C(25) 25(2) 41(2) 29(1) 8(1) -3(1) -3(1)

C(26) 58(2) 50(2) 46(2) -1(1) 12(1) -3(2)
